# Supplementary material for: Cytotoxic Prenylated Xanthones from the Pericarps of Garcinia mangostana
Source: PubMed Central journal article supplement (PMC6271135; doi:10.3390/molecules19021820), 2014-02-06

# Supplementary Materials

## Table of Contents

|                                                                                                |     |
|------------------------------------------------------------------------------------------------|-----|
| <b>Figure S1:</b> HREIMS of compound <b>1</b>                                                  | S2  |
| <b>Figure S2:</b> $^1\text{H-NMR}$ (400 MHz, acetone- $d_6$ ) spectrum of compound <b>1</b>    | S3  |
| <b>Figure S3:</b> $^{13}\text{C-NMR}$ (100 MHz, acetone- $d_6$ ) spectrum of compound <b>1</b> | S4  |
| <b>Figure S4:</b> gHMQC of compound <b>1</b>                                                   | S5  |
| <b>Figure S5:</b> $^1\text{H-}^1\text{H}$ gCOSY of compound <b>1</b>                           | S6  |
| <b>Figure S6:</b> gHMBC of compound <b>1</b>                                                   | S7  |
| <b>Figure S7:</b> HREIMS of compound <b>2</b>                                                  | S8  |
| <b>Figure S8:</b> $^1\text{H-NMR}$ (400 MHz, acetone- $d_6$ ) spectrum of compound <b>2</b>    | S9  |
| <b>Figure S9:</b> $^{13}\text{C-NMR}$ (100 MHz, acetone- $d_6$ ) spectrum of compound <b>2</b> | S10 |
| <b>Figure S10:</b> gHMQC of compound <b>2</b>                                                  | S11 |
| <b>Figure S11:</b> $^1\text{H-}^1\text{H}$ gCOSY of compound <b>2</b>                          | S12 |
| <b>Figure S12:</b> gHMBC of compound <b>2</b>                                                  | S13 |

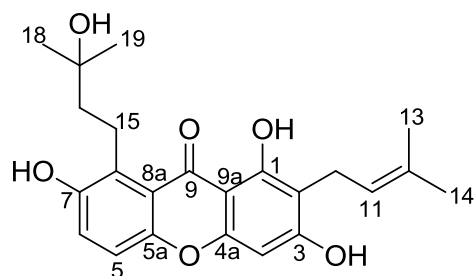

1,3,7-trihydroxy-2-(3-methyl-2-butenyl)-8-(3-hydroxy-3-methylbutyl)-xanthone (**1**)

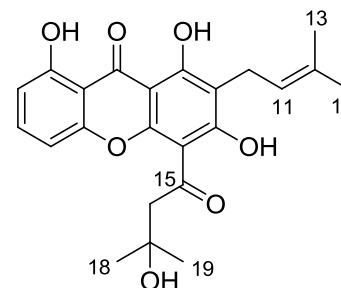

1,3,8-trihydroxy-2-(3-methyl-2-butenyl)-4-(3-hydroxy-3-methylbutanoyl)-xanthone (**2**)

Figure S1. HREIMS of compound 1.

## SPECTRUM - MS

File : D:\DATA-HR\13\092605-sz-c3.RAW

Full ms [390.500 - 408.500 ] - Range: 398.100 - 398.300

Scan No. 1 of 23

Scan #: 1

RT: 0.04

Data points: 1

| Mass     | Relative Intensity | Theoretical Mass | Delta [ppm] | Delta [mmu] | RDB  | Composition                                    |
|----------|--------------------|------------------|-------------|-------------|------|------------------------------------------------|
| 398.1725 | 9.1                | 398.1724         | 0.3         | 0.1         | 11.0 | C <sub>23</sub> H <sub>26</sub> O <sub>6</sub> |

Instrument: MAT 95XP(Thermo)  
D:\DATA-HR\13\092605-sz-c3

9/26/2013 5:03:22

?LC1-CC1

092605-sz-c3 #1 RT: 0.04 AV: 1 NL: 1.10E3  
T: + c EI Full ms [ 390.50-408.50]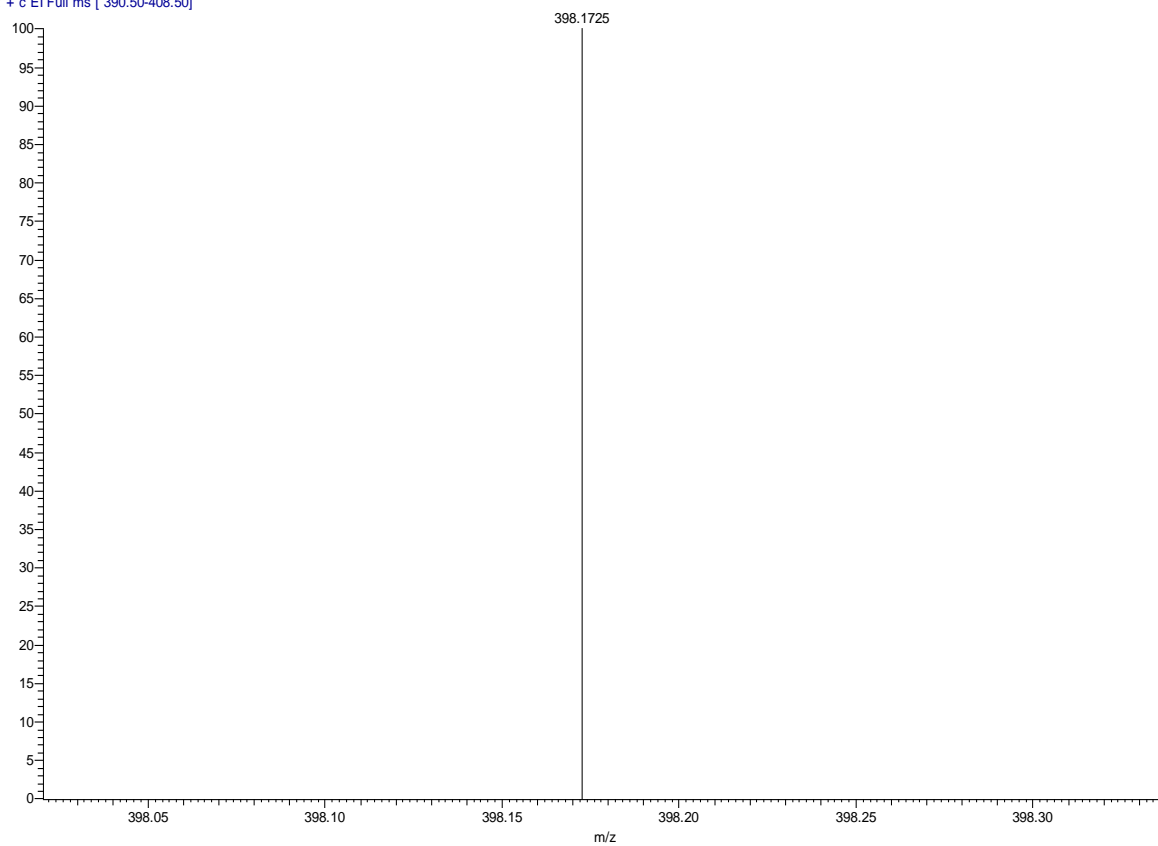

**Figure S2.**  $^1\text{H-NMR}$  (400 MHz, acetone- $d_6$ ) spectrum of compound 1.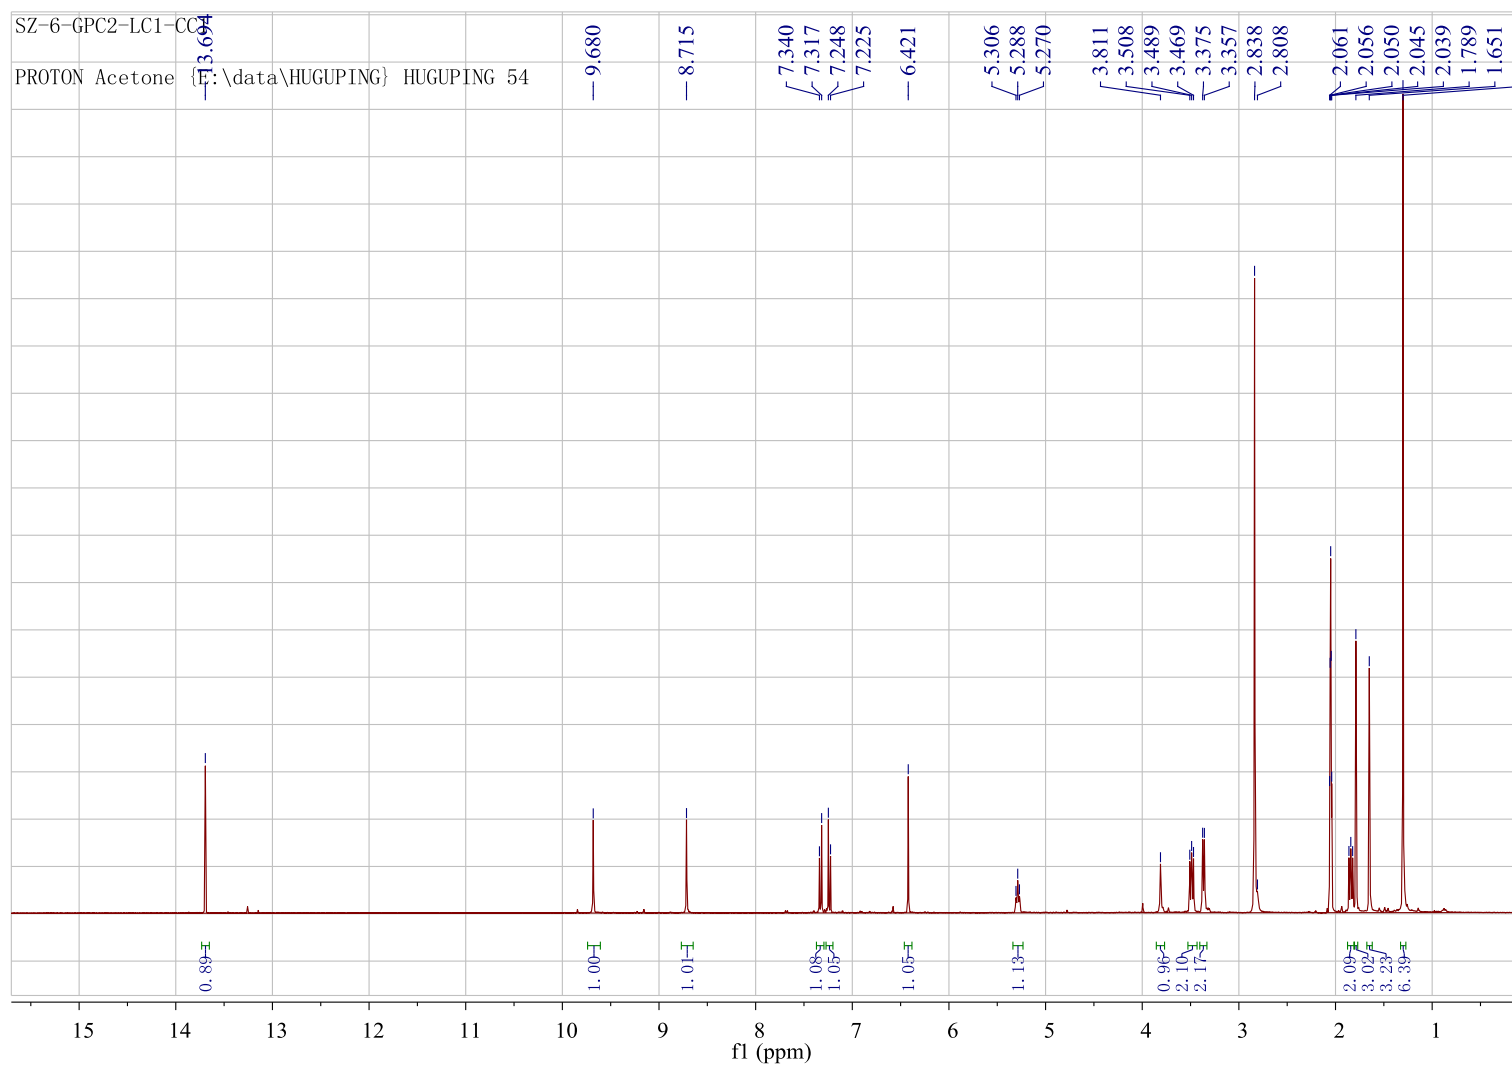

**Figure S3.**  $^{13}\text{C}$ -NMR (100 MHz, acetone- $d_6$ ) spectrum of compound 1.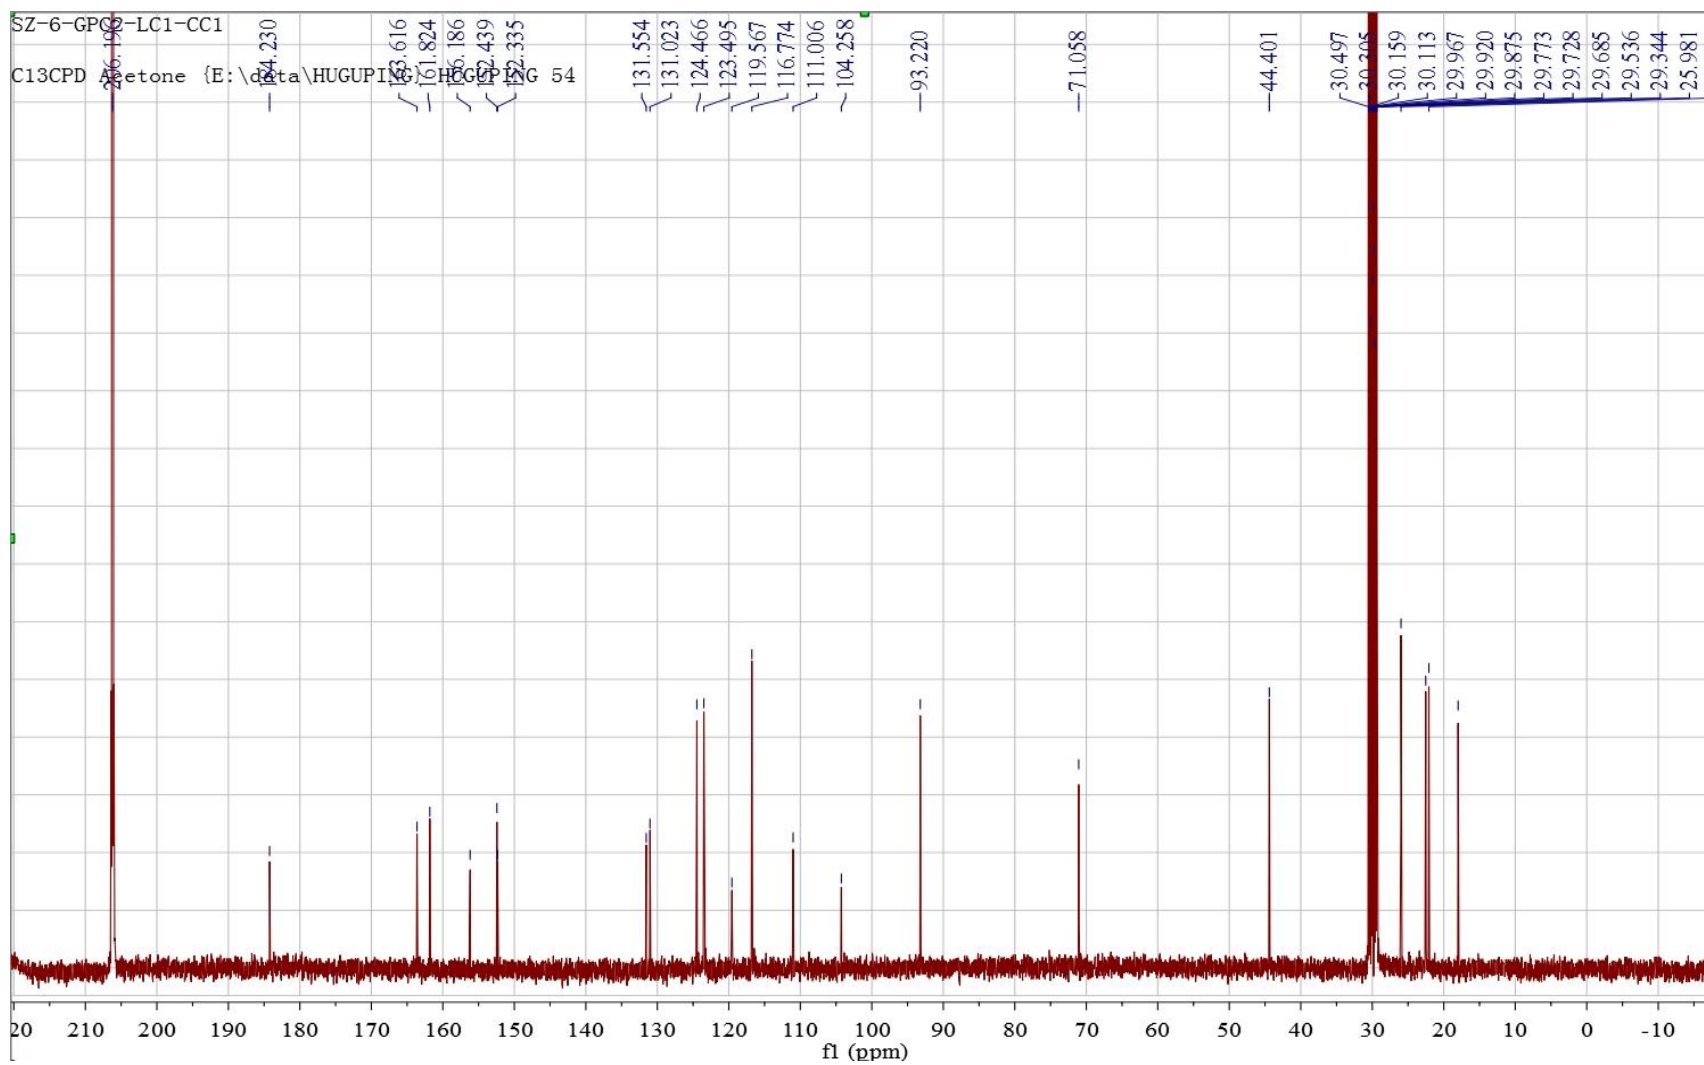

Figure S4. gHMQC of compound 1.

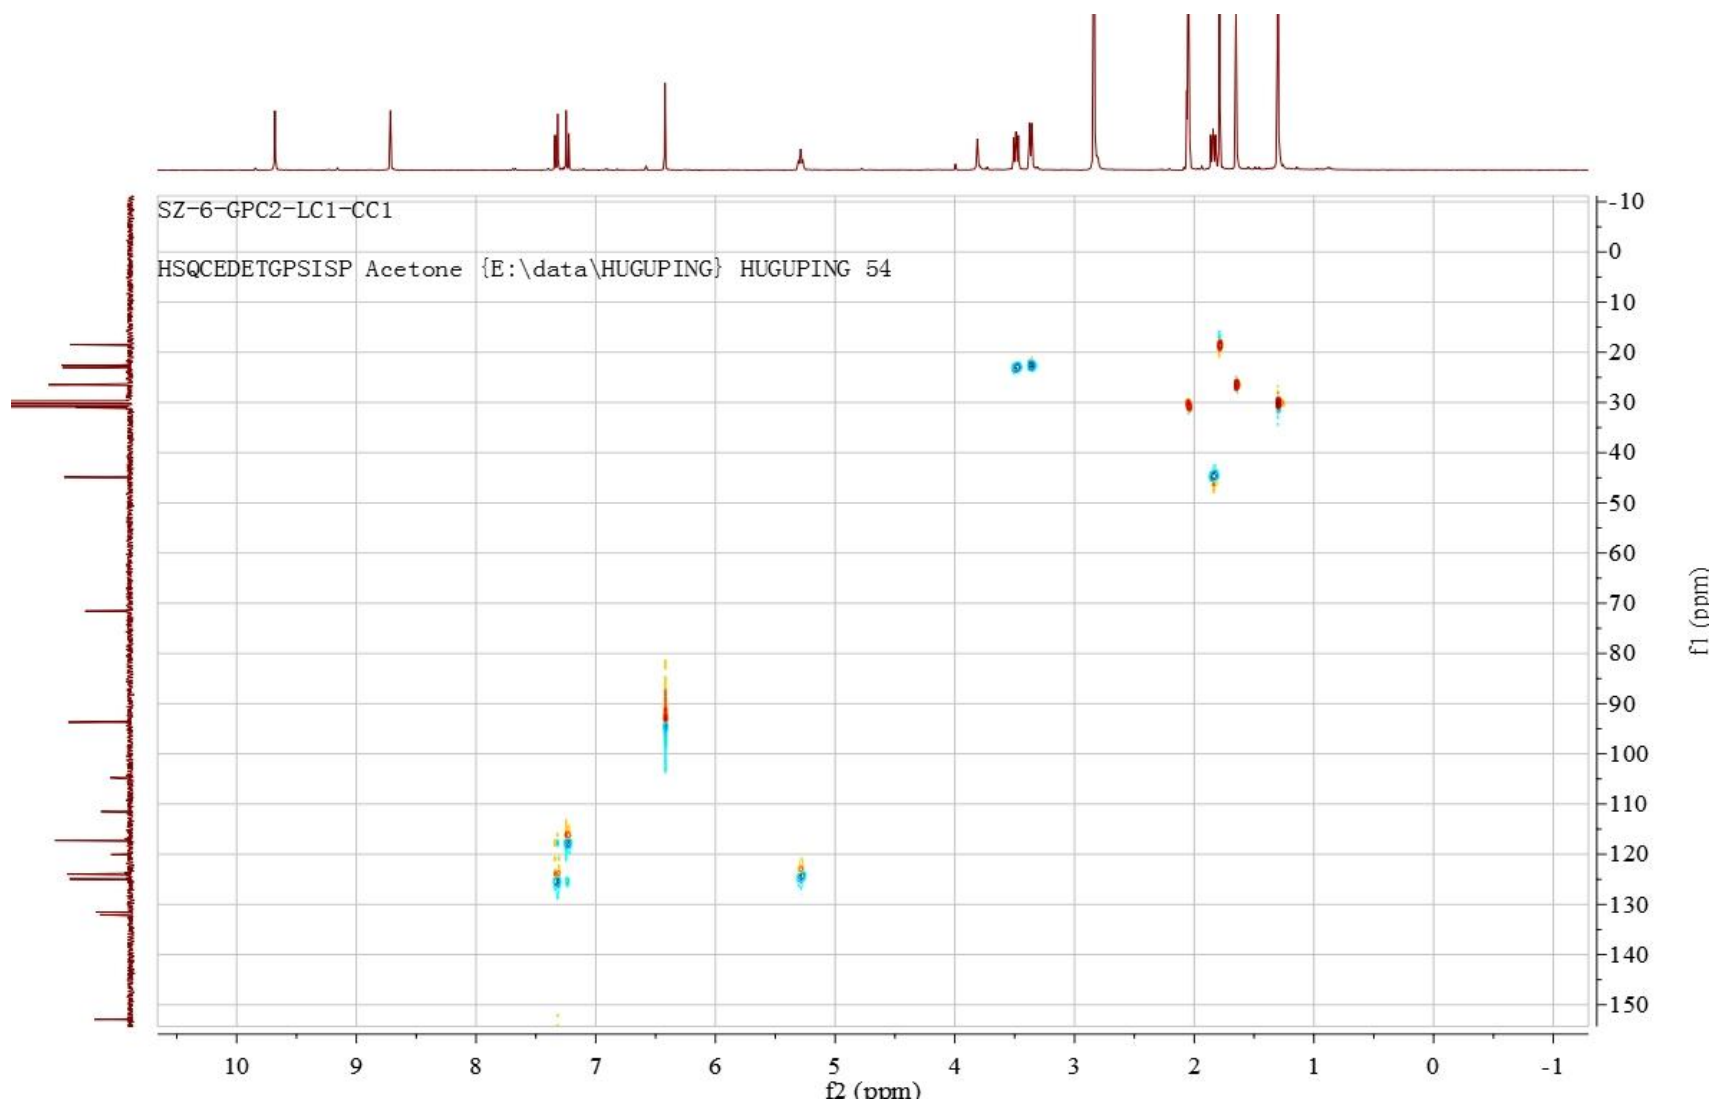

**Figure S5.**  $^1\text{H}$ - $^1\text{H}$  gCOSY of compound 1.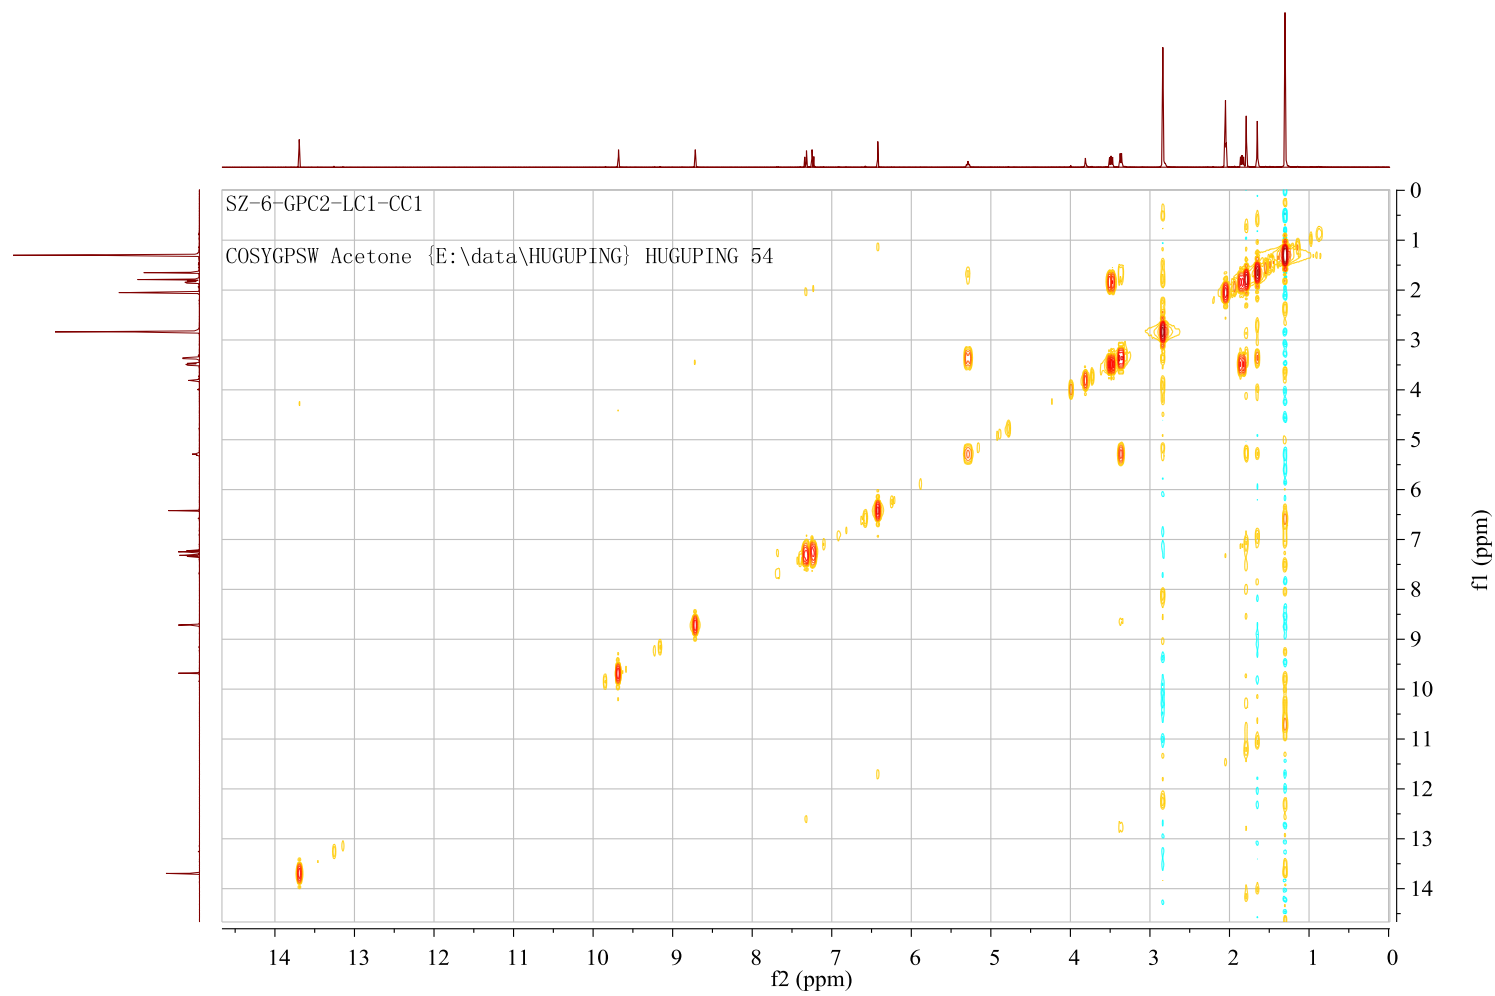

Figure S6. gHMBC of compound 1.

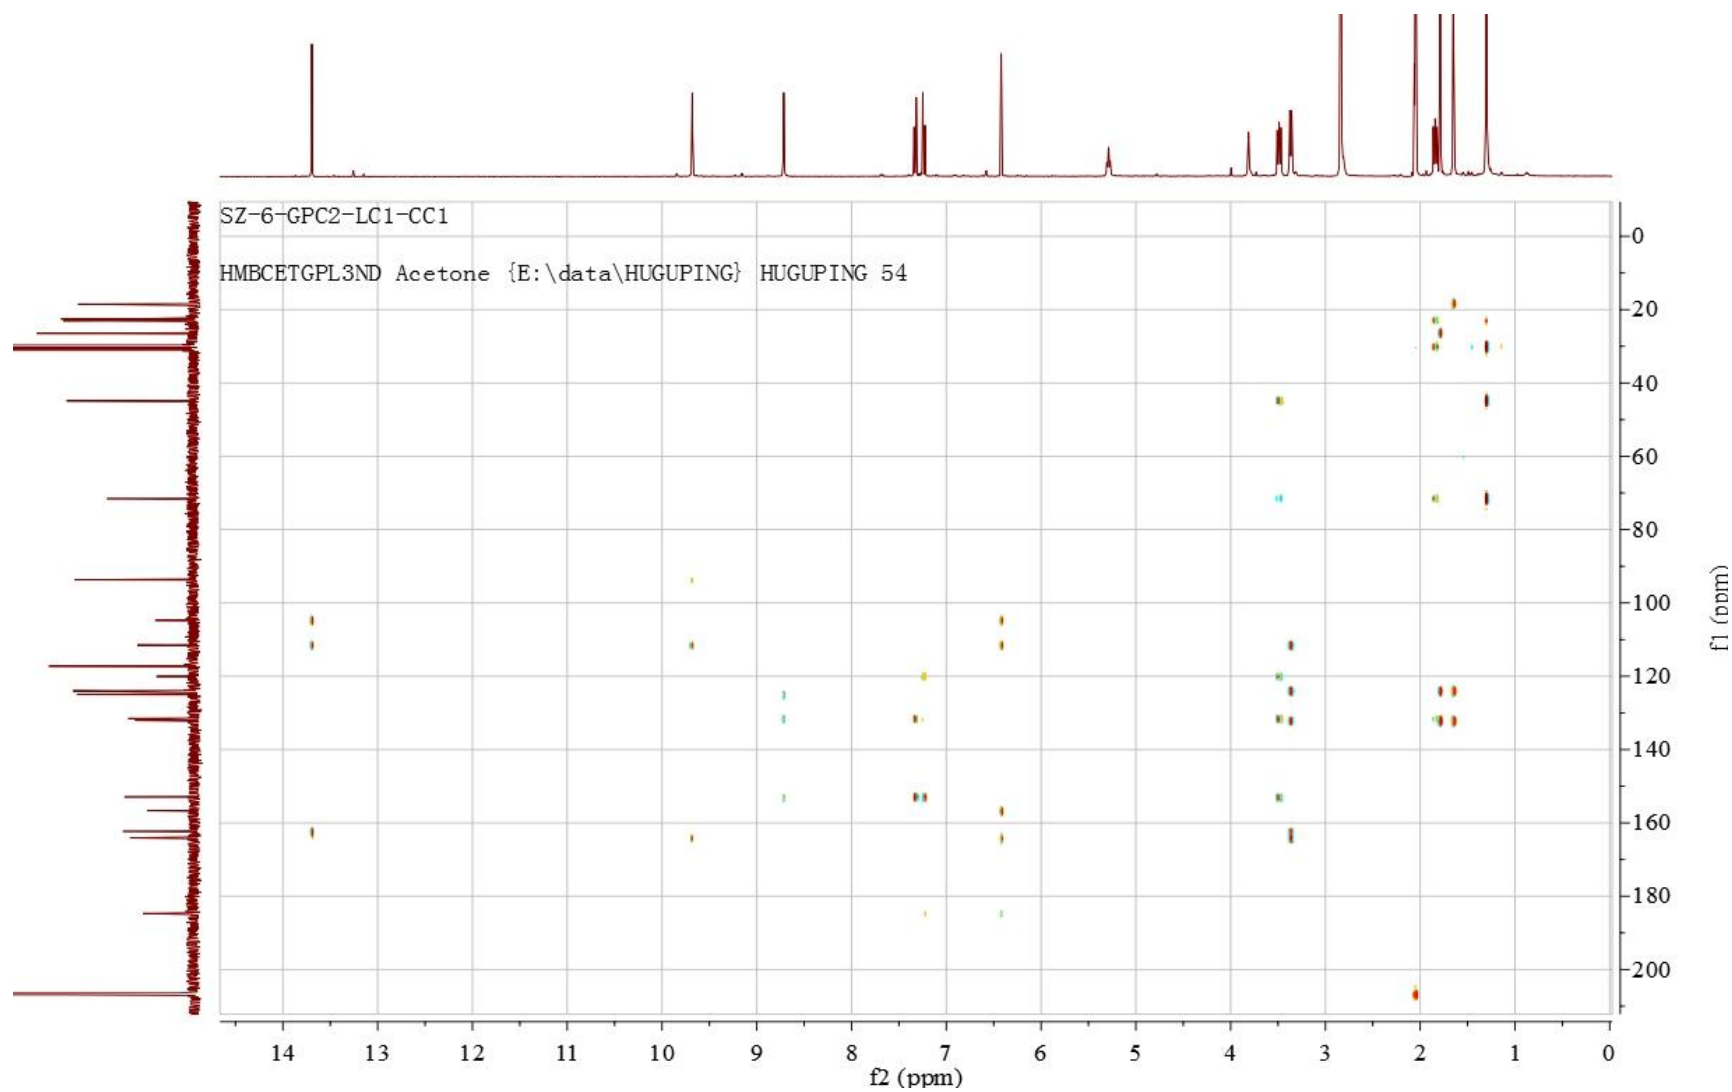

Figure S7. HREIMS of compound 2.

## SPECTRUM - MS

File : D:\DATA-HR\13\060902-sz-2-c1.RAW

Full ms [400.500 - 421.500 ] - Range: 412.000 - 412.390

Scan No. 12 of 21

Scan #: 12

RT: 0.45

Data points: 1

| Mass     | Relative Intensity | Theoretical Mass | Delta [ppm] | Delta [mmu] | RDB  | Composition                                    |
|----------|--------------------|------------------|-------------|-------------|------|------------------------------------------------|
| 412.1517 | 38.8               | 412.1517         | 0.1         | 0.0         | 12.0 | C <sub>23</sub> H <sub>24</sub> O <sub>7</sub> |

Instrument: MAT 95XP(Thermo)  
D:\DATA-HR\13\060902-sz-2-c1 6/9/2013 9:42:10 #060902-sz-2-c1 #12 RT: 0.45 AV: 1 NL: 9.32E3  
T: + c EI Full ms [ 400.50-421.50]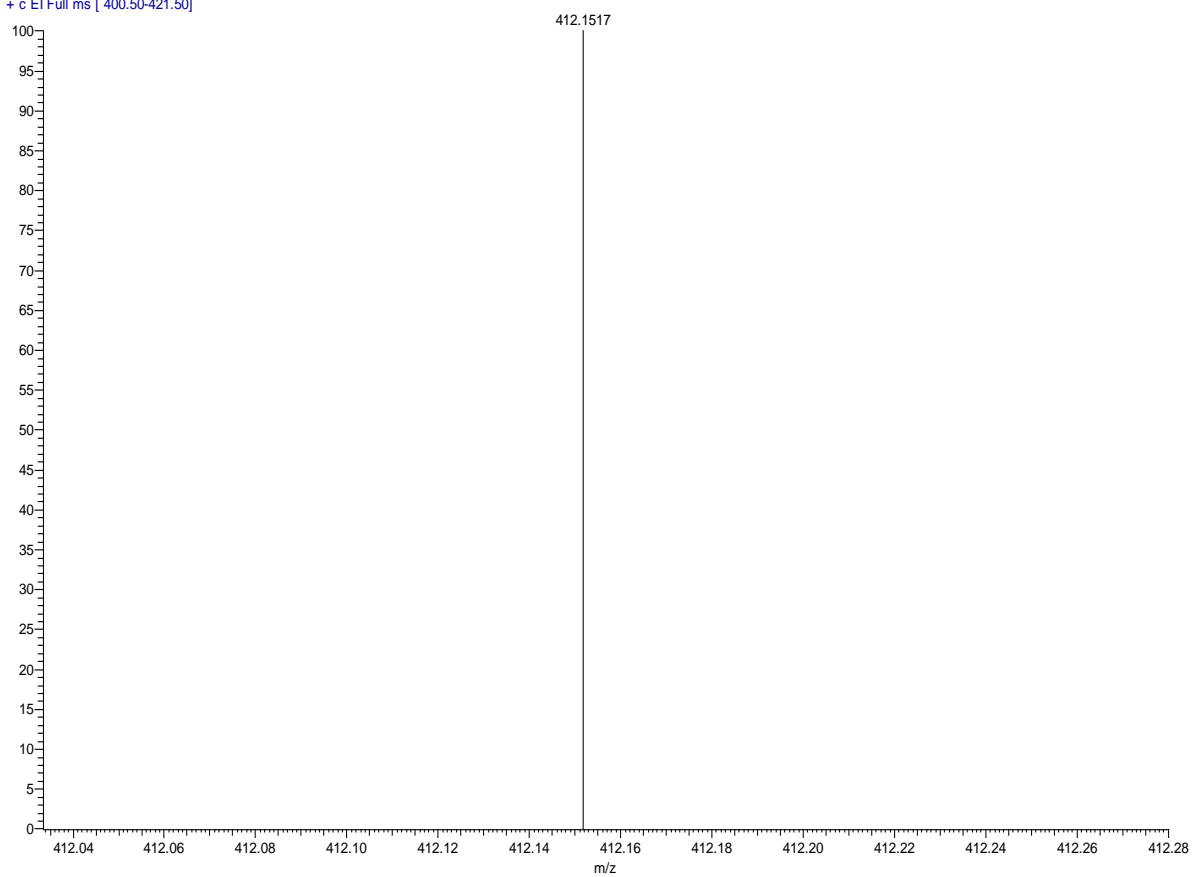



**Figure S8.**  $^1\text{H-NMR}$  (400 MHz, acetone- $d_6$ ) spectrum of compound 2.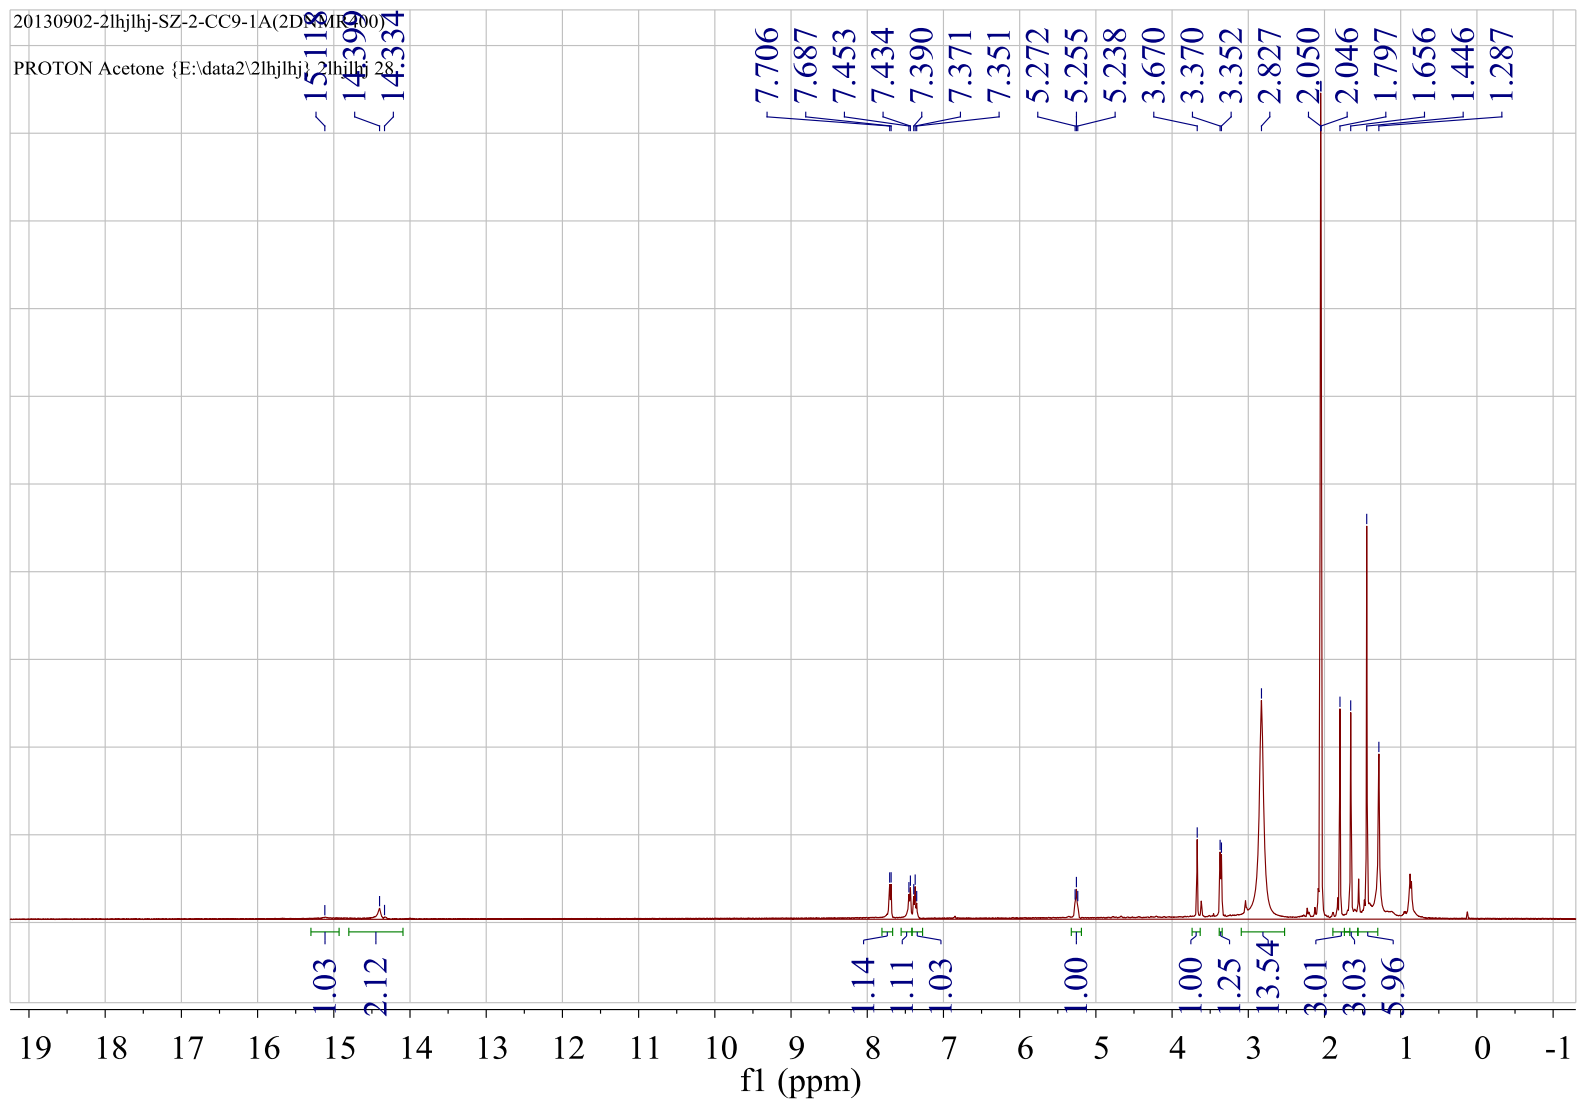

**Figure S9.**  $^{13}\text{C}$ -NMR (100 MHz, acetone- $d_6$ ) spectrum of compound 2.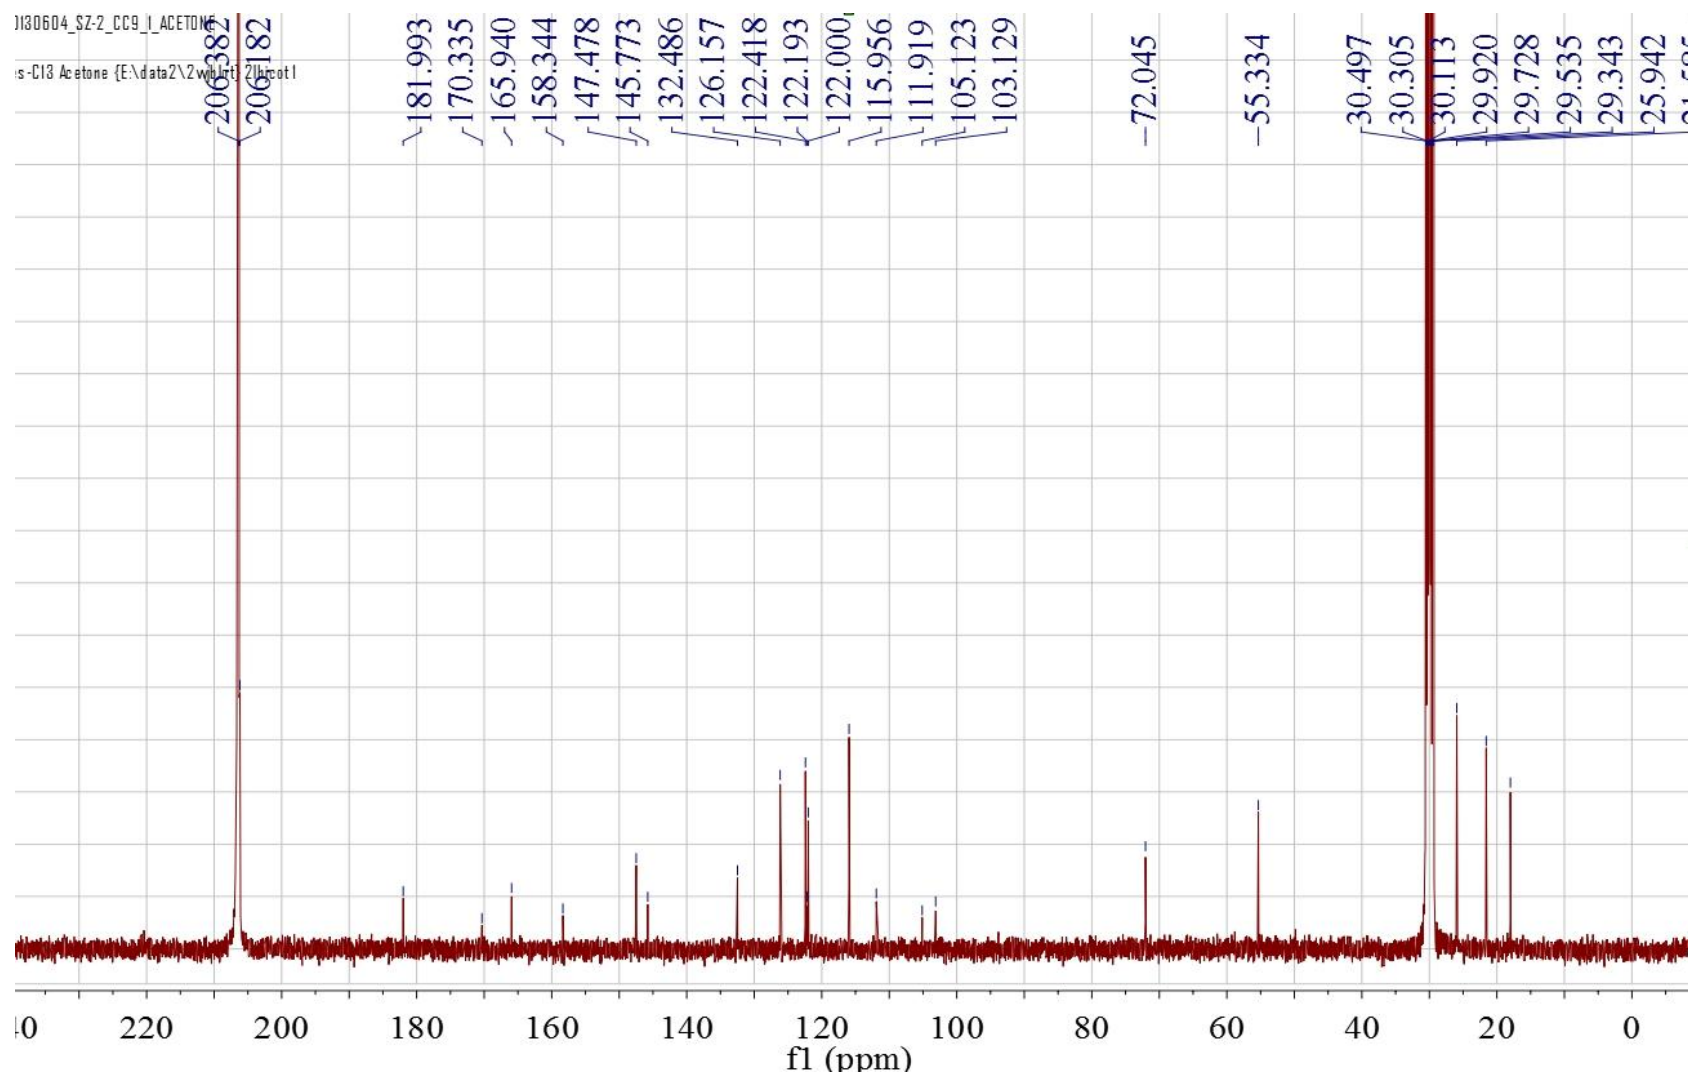

Figure S10. gHMQC of compound 2.

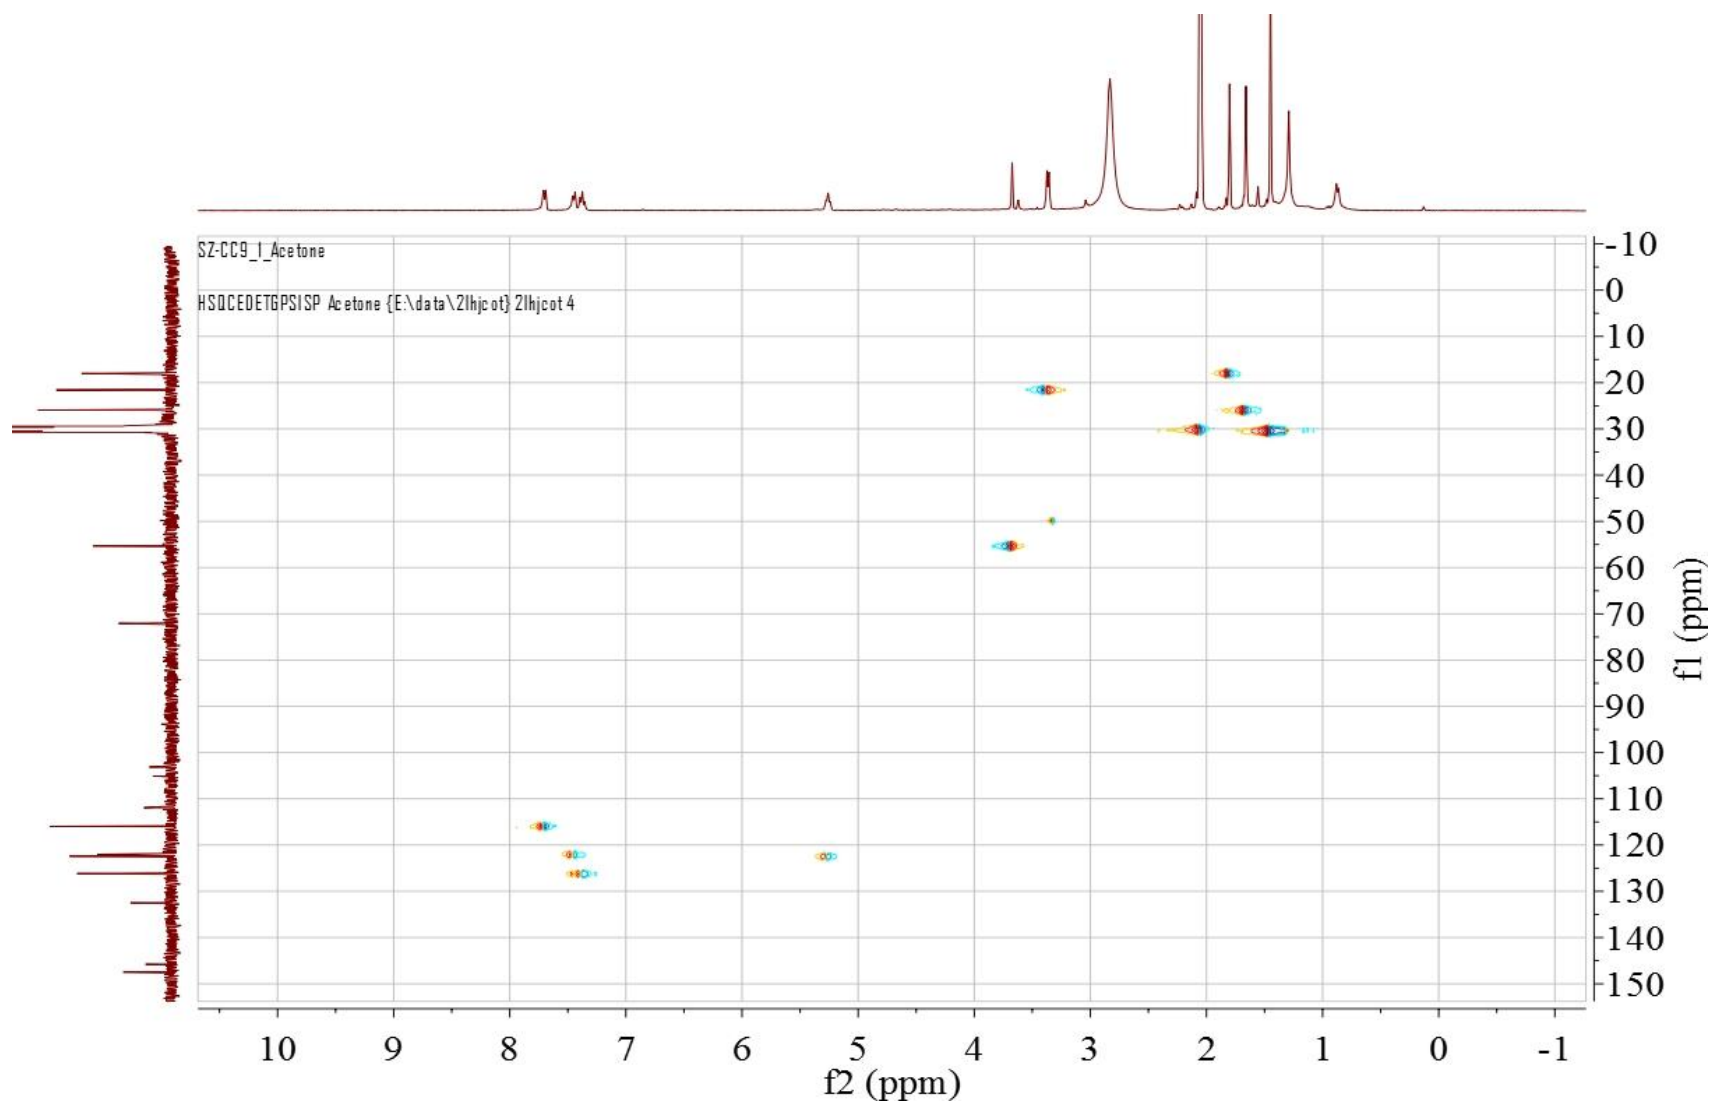

Figure S11.  $^1\text{H}$ - $^1\text{H}$  gCOSY of compound 2.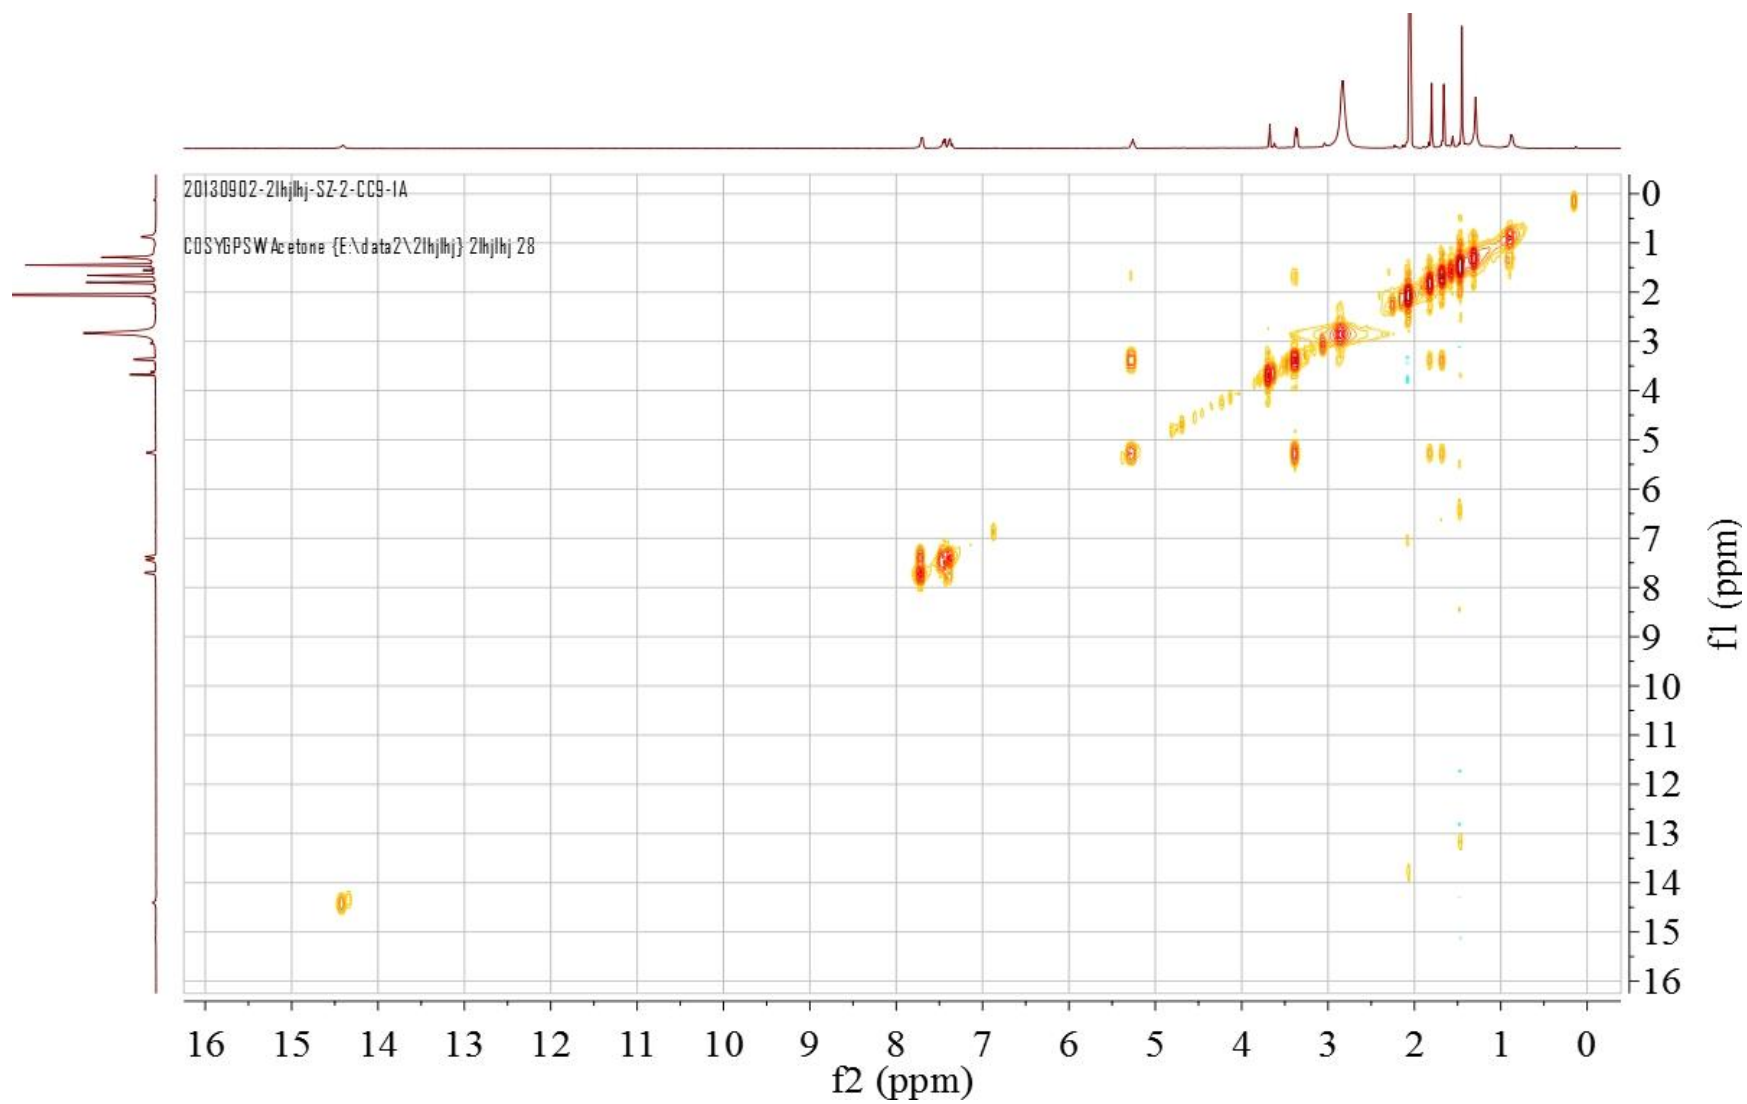

Figure S12. gHMBC of compound 2.

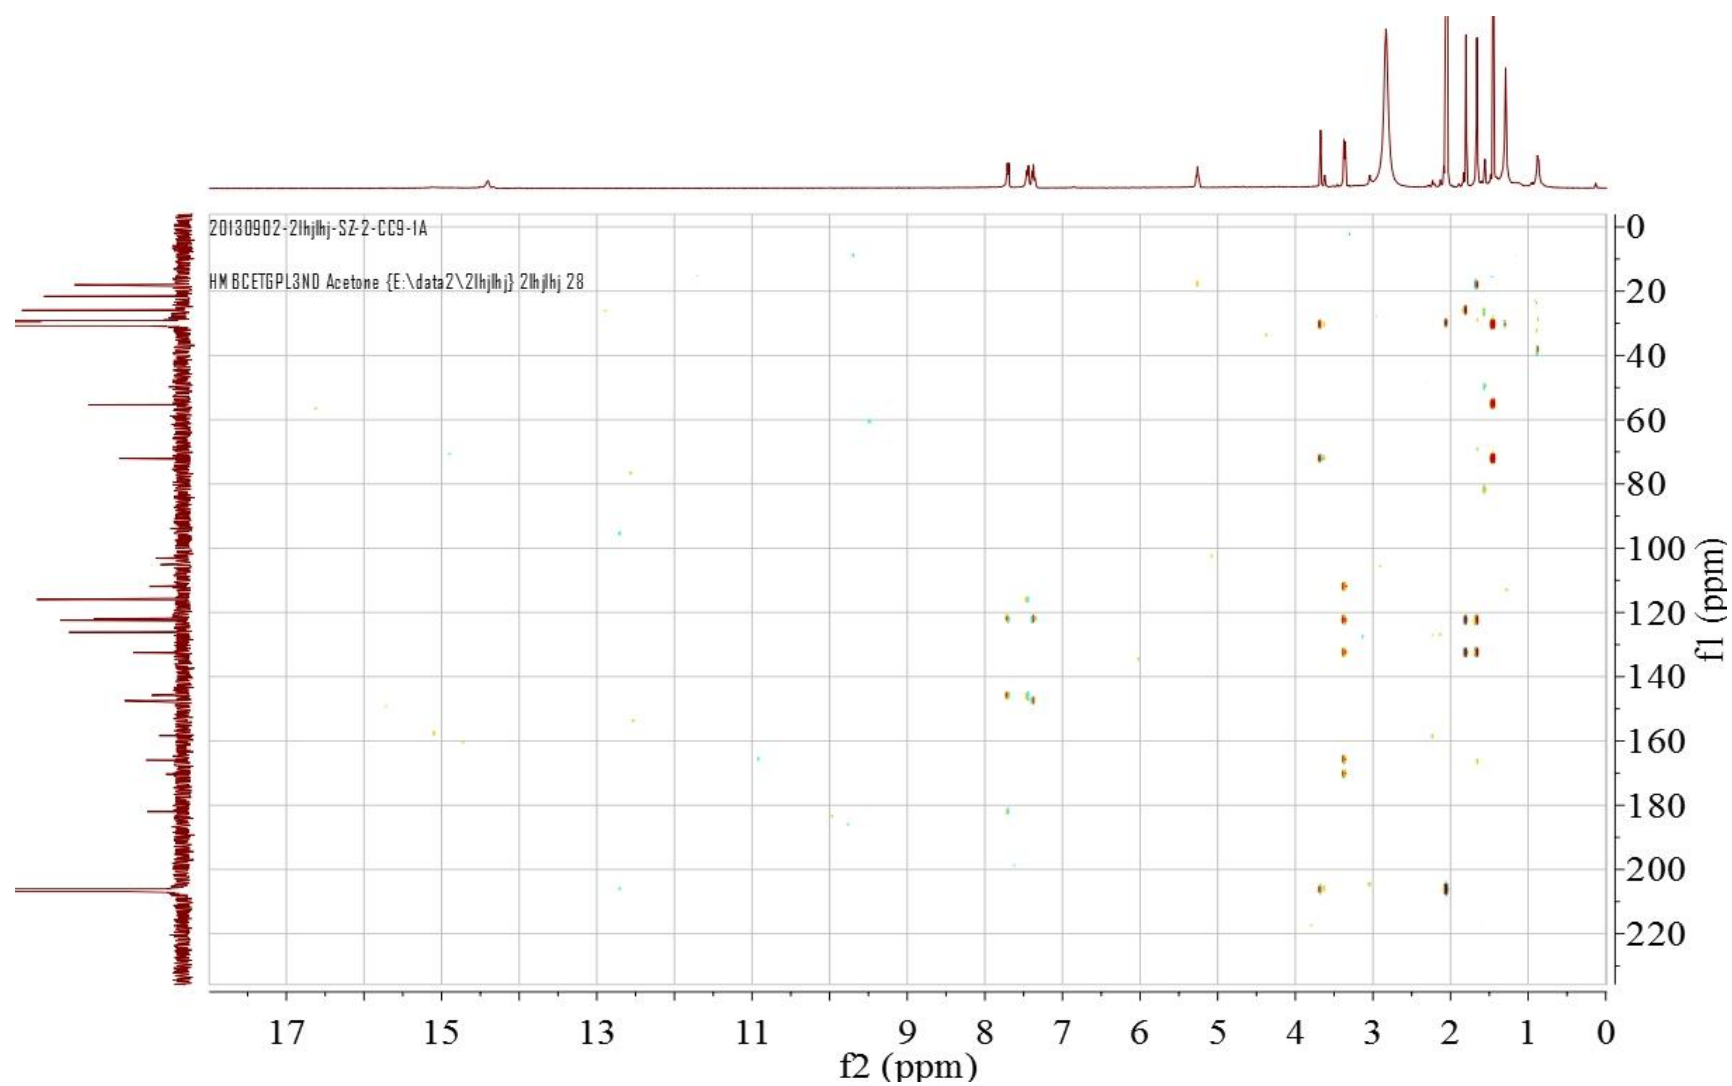

Supplement: molecules-19-01820-s001.pdf [file molecules-19-01820-s001.pdf]
